# Supplementary material for: A Retrospective Analysis of Dabrafenib and/or Dabrafenib Plus Trametinib Combination in Patients with Metastatic Melanoma to Characterize Patients with Long-Term Benefit in the Individual Patient Program (DESCRIBE III)
Source: MDPI journal article supplement (doi:10.3390/cancers13102466), 2021-05-18
Supplement: s1 [file s1]

## Article

# A Retrospective Analysis of Dabrafenib and/or Dabrafenib Plus Trametinib Combination in Patients with Metastatic Melanoma to Characterize Patients with Long-Term Benefit in the Individual Patient Program (DESCRIBE III)

Victoria G. Atkinson <sup>1,\*</sup>, Pietro Quaglini <sup>2</sup>, Massimo Aglietta <sup>3</sup>, Michele Del Vecchio <sup>4</sup>, Roberta Depenni <sup>5</sup>, Francesca Consoli <sup>6</sup>, Dimitrios Bafaloukos <sup>7</sup>, Pier Francesco Ferrucci <sup>8</sup>, Skaiste Tulyte <sup>9</sup>, Ivana Krajsova <sup>10</sup>, Paolo A. Ascierto <sup>11</sup>, Rossana Gueli <sup>12</sup>, Ana Arance <sup>13</sup>, Helen Gogas <sup>14</sup>, Hiya Banerjee <sup>15</sup>, Teddy Saliba <sup>15</sup>, Egbert de Jong <sup>16</sup>, and Bart Neyns <sup>17</sup>

<sup>1</sup> Division of Cancer Services, Princess Alexandra Hospital, University of Queensland, Brisbane QLD 4102, Australia

<sup>2</sup> Department of Medical Sciences, Section of Dermatology, University of Turin, 10124 Turin, Italy; [pietro.quaglini@unito.it](mailto:pietro.quaglini@unito.it)

<sup>3</sup> Candiolo Cancer Institute FPO-IRCCS, Candiolo, Department of Oncology, University of Torino, 10124 Turin, Italy; [massimo.aglietta@ircc.it](mailto:massimo.aglietta@ircc.it)

<sup>4</sup> Unit of Melanoma Medical Oncology, Department of Medical Oncology and Hematology, Fondazione IRCCS Istituto Nazionale dei Tumori, 20133 Milan, Italy; [Michele.DelVecchio@istitutotumori.mi.it](mailto:Michele.DelVecchio@istitutotumori.mi.it)

<sup>5</sup> Department of Oncology and Hematology, University of Modena and Reggio Emilia, 41121 Modena, Italy; [depenni.roberta@policlinico.mo.it](mailto:depenni.roberta@policlinico.mo.it)

<sup>6</sup> Medical Oncology, ASST Spedali Civili, 25123 Brescia, Italy; [francesca.consoli@libero.it](mailto:francesca.consoli@libero.it)

<sup>7</sup> Medical Oncology, Metropolitan Hospital, 18547 Athens, Greece; [dimpmp@otenet.gr](mailto:dimpmp@otenet.gr)

<sup>8</sup> Tumor Biotherapy Unit, Department of Experimental Oncology, IEO—Istituto Europeo di Oncologia—IRCCS, 20141 Milan, Italy; [pier.ferrucci@ieo.it](mailto:pier.ferrucci@ieo.it)

<sup>9</sup> Hematology, Oncology and Transfusion Medicine Center, Vilnius University, 08410 Vilnius, Lithuania; [skaiste.tulyte@santa.lt](mailto:skaiste.tulyte@santa.lt)

<sup>10</sup> Department of Dermatovenerology, University Hospital Prague, Charles University, 12808 Prague, Czech Republic; [ivana.krajsova@vfn.cz](mailto:ivana.krajsova@vfn.cz)

<sup>11</sup> Melanoma Unit, Cancer Immunotherapy and Innovative Therapies, Istituto Nazionale Tumori-IRCCS “Fondazione G. Pascale” 80131 Naples, Italy; [paolo.ascierto@gmail.com](mailto:paolo.ascierto@gmail.com)

<sup>12</sup> Oncology Unit, ASST Sette Laghi, 21100 Varese, Italy; [rossana.gueli@asst-settelaghi.it](mailto:rossana.gueli@asst-settelaghi.it)

<sup>13</sup> Department of Medical Oncology, Hospital Clinic of Barcelona, 08036 Barcelona, Spain; [amarance@clinic.cat](mailto:amarance@clinic.cat)

<sup>14</sup> Department of Internal Medicine, Laiko General Hospital, National and Kapodistrian University of Athens School of Medicine, 11527 Athens, Greece; [helgogas@gmail.com](mailto:helgogas@gmail.com)

<sup>15</sup> Novartis Pharmaceuticals Corporation, East Hanover, NJ 07936, USA; [hiya.banerjee@novartis.com](mailto:hiya.banerjee@novartis.com) (H.B.); [teddy.saliba@novartis.com](mailto:teddy.saliba@novartis.com) (T.S.)

<sup>16</sup> Novartis AG, 4057 Basel, Switzerland; [egbert.de\\_jong@novartis.com](mailto:egbert.de_jong@novartis.com)

<sup>17</sup> Medical Oncology, Universitair Ziekenhuis Brussel, 1090 Brussels, Belgium; [Bart.Neyns@uzbrussel.be](mailto:Bart.Neyns@uzbrussel.be)

\* Correspondence: [victoria.atkinson@health.qld.gov.au](mailto:victoria.atkinson@health.qld.gov.au)

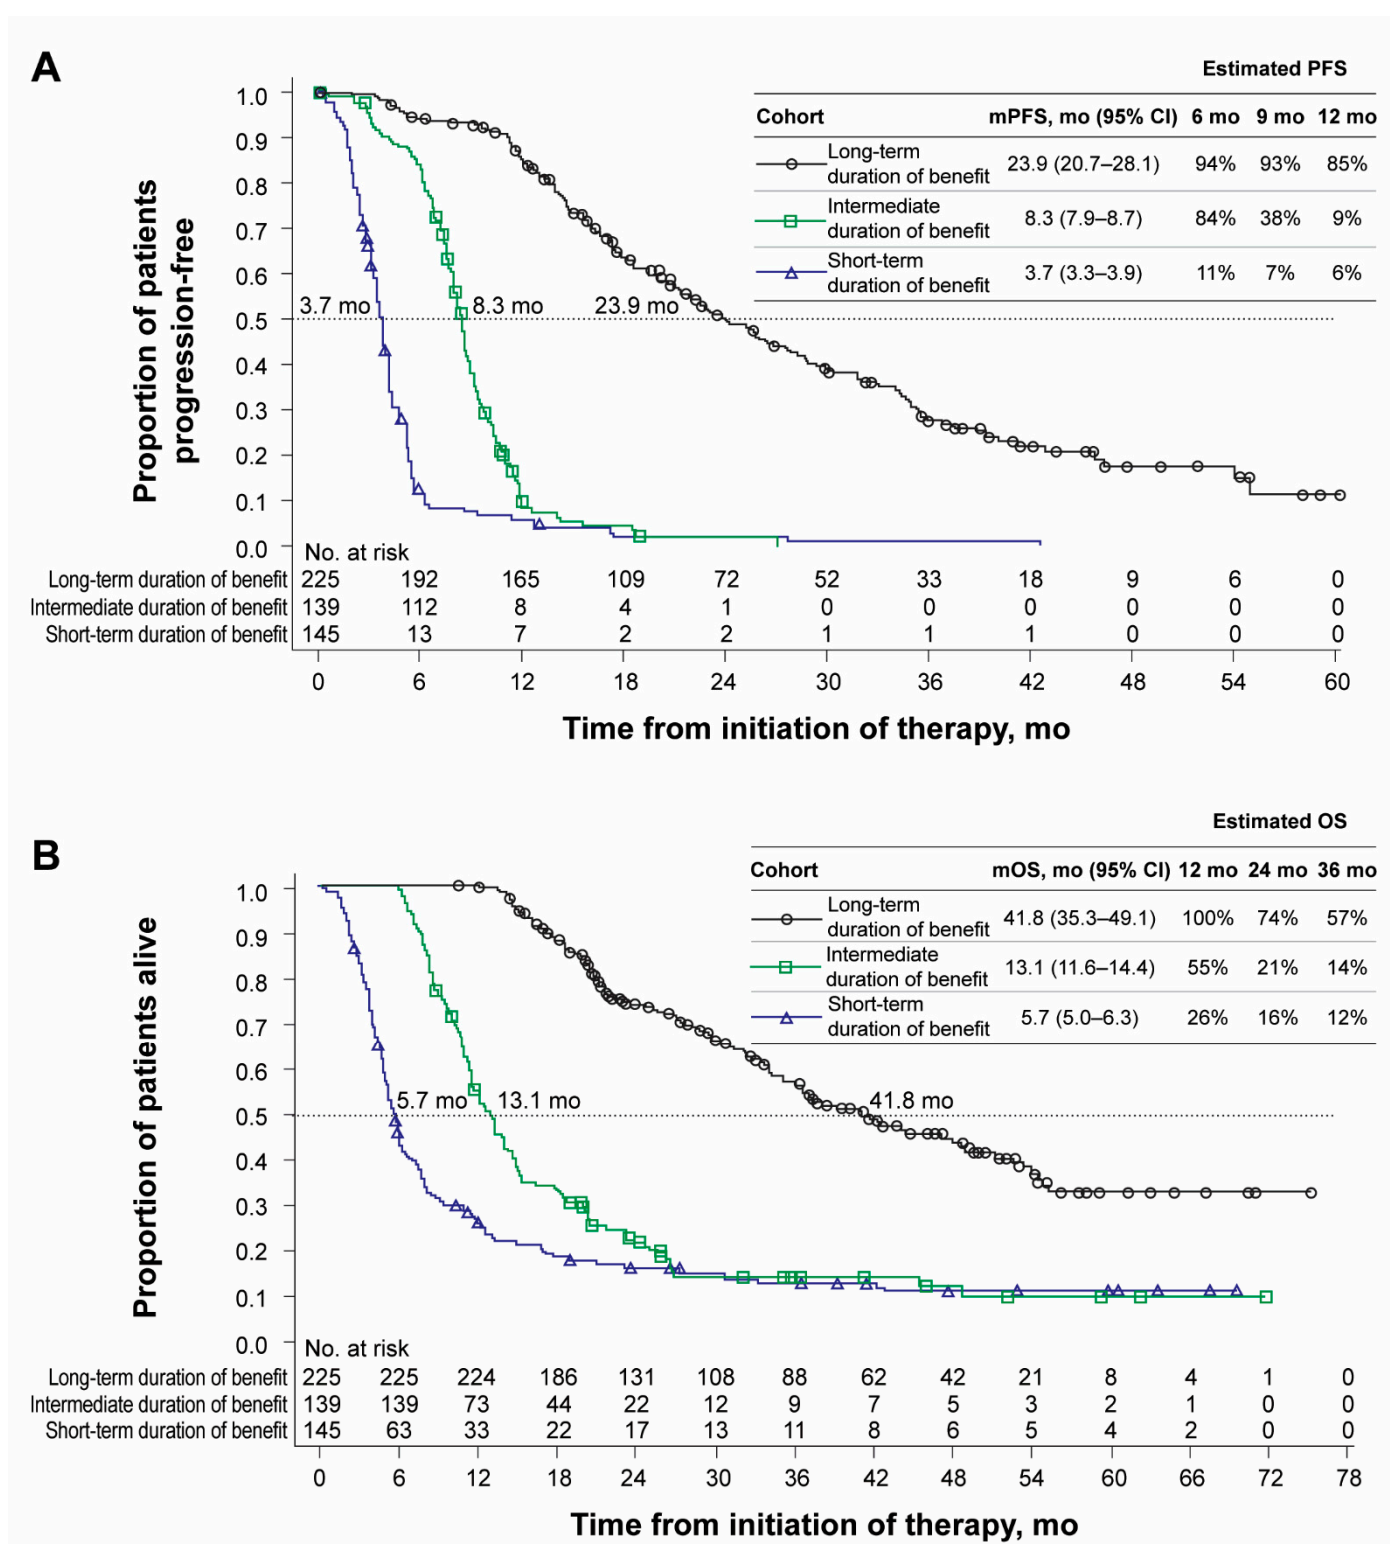

**Figure S1.** (A) PFS and (B) OS in patients in the long-term, intermediate, and short-term duration of benefit groups. CI, confidence interval; mOS, median overall survival; mPFS, median progression-free survival; OS, overall survival; PFS, progression-free survival.

Table S1. On-treatment deaths.

| Primary reason for death,<br><i>n</i> (%) | Long-term Duration of<br>Benefit, ≥12 months<br>( <i>n</i> = 225) | Intermediate<br>Duration of Benefit,<br>≥6 mo and <12 months<br>( <i>n</i> = 139) | Short-term Duration of<br>Benefit, <6 months<br>( <i>n</i> = 145) | Overall<br>( <i>N</i> = 509) |
|-------------------------------------------|-------------------------------------------------------------------|-----------------------------------------------------------------------------------|-------------------------------------------------------------------|------------------------------|
| On-treatment deaths                       | 32 (14.2)                                                         | 39 (28.1)                                                                         | 56 (38.6)                                                         | 127 (25.0)                   |
| Melanoma                                  | 24 (10.7)                                                         | 32 (23.0)                                                                         | 49 (33.8)                                                         | 105 (20.6)                   |
| Other                                     | 8 (3.6)                                                           | 7 (5.0)                                                                           | 7 (4.8)                                                           | 22 (4.3)                     |
| Disease progression                       | 5 (2.2)                                                           | 4 (2.9)                                                                           | 3 (2.1)                                                           | 12 (2.4)                     |
| Unknown                                   | 1 (0.4)                                                           | 1 (0.7)                                                                           | 0                                                                 | 2 (0.4)                      |
| Neoplasm progression                      | 0                                                                 | 1 (0.7)                                                                           | 1 (0.7)                                                           | 2 (0.4)                      |
| Adverse event                             | 1 (0.4)                                                           | 0                                                                                 | 0                                                                 | 1 (0.2)                      |
| Pneumonia                                 | 1 (0.4)                                                           | 0                                                                                 | 0                                                                 | 1 (0.2)                      |
| Pulmonary hypertension                    | 0                                                                 | 1 (0.7)                                                                           | 0                                                                 | 1 (0.2)                      |
| Cerebral disorder                         | 0                                                                 | 0                                                                                 | 1 (0.7)                                                           | 1 (0.2)                      |
| Pleural effusion                          | 0                                                                 | 0                                                                                 | 1 (0.7)                                                           | 1 (0.2)                      |
| Salmonellosis                             | 0                                                                 | 0                                                                                 | 1 (0.7)                                                           | 1 (0.2)                      |

**Table S2.** Reasons for dose reductions, interruptions, and permanent discontinuations.

| Reasons for dose reductions, interruptions, and permanent discontinuations | Long-term Duration of Benefit, ≥12 months<br>(n = 225) | Intermediate Duration of Benefit, ≥6 mo and <12 months<br>(n = 139) | Short-term Duration of Benefit, <6 months<br>(n = 145) | Overall<br>(N = 509) |
|----------------------------------------------------------------------------|--------------------------------------------------------|---------------------------------------------------------------------|--------------------------------------------------------|----------------------|
| Dose reduction of dab, n (%)                                               | 34 (15.1)                                              | 12 (8.6)                                                            | 9 (6.2)                                                | 55 (10.8)            |
| Reasons for dose reductions                                                |                                                        |                                                                     |                                                        |                      |
| Adverse event                                                              | 27 (79.4)                                              | 8 (66.7)                                                            | 7 (77.8)                                               | 42 (76.4)            |
| Physician decision                                                         | 10 (29.4)                                              | 6 (50.0)                                                            | 2 (22.2)                                               | 18 (32.7)            |
| Technical problems                                                         | 2 (5.9)                                                | 0                                                                   | 0                                                      | 2 (3.6)              |
| Dose reduction of tram, n (%)                                              | 19 (8.4)                                               | 10 (7.2)                                                            | 2 (1.4)                                                | 31 (6.1)             |
| Reasons for dose reductions                                                |                                                        |                                                                     |                                                        |                      |
| Adverse event                                                              | 16 (84.2)                                              | 6 (60.0)                                                            | 1 (50.0)                                               | 23 (74.2)            |
| Physician decision                                                         | 3 (15.8)                                               | 4 (40.0)                                                            | 1 (50.0)                                               | 8 (25.8)             |
| Dosing error                                                               | 0                                                      | 1 (10.0)                                                            | 0                                                      | 1 (3.2)              |
| Interruption of dab treatment, n (%)                                       | 65 (28.9)                                              | 35 (25.2)                                                           | 34 (23.4)                                              | 134 (26.3)           |
| Reasons for treatment interruptions                                        |                                                        |                                                                     |                                                        |                      |
| Adverse event                                                              | 61 (93.8)                                              | 30 (85.7)                                                           | 28 (82.4)                                              | 119 (88.8)           |
| Physician decision                                                         | 11 (16.9)                                              | 2 (5.7)                                                             | 0                                                      | 13 (9.7)             |
| Patient/guardian decision                                                  | 4 (6.2)                                                | 1 (2.9)                                                             | 0                                                      | 5 (3.7)              |
| As per protocol                                                            | 2 (3.1)                                                | 0                                                                   | 0                                                      | 2 (1.5)              |
| Disease improvement under study                                            | 1 (1.5)                                                | 1 (2.9)                                                             | 0                                                      | 2 (1.5)              |
| Interruption of tram treatment, n (%)                                      | 57 (25.3)                                              | 31 (22.3)                                                           | 25 (17.2)                                              | 113 (22.2)           |
| Reasons for treatment interruptions                                        |                                                        |                                                                     |                                                        |                      |
| Adverse event                                                              | 52 (91.2)                                              | 25 (80.6)                                                           | 17 (68.0)                                              | 94 (83.2)            |
| Physician decision                                                         | 10 (17.5)                                              | 3 (9.7)                                                             | 0                                                      | 13 (11.5)            |
| Patient/guardian decision                                                  | 3 (5.3)                                                | 1 (3.2)                                                             | 0                                                      | 4 (3.5)              |
| As per protocol                                                            | 2 (3.5)                                                | 0                                                                   | 0                                                      | 2 (1.8)              |
| Disease improvement under study                                            | 1 (1.8)                                                | 1 (3.2)                                                             | 0                                                      | 2 (1.8)              |
| Technical problems                                                         | 1 (1.8)                                                | 0                                                                   | 0                                                      | 1 (0.9)              |
| Permanent discontinuation of dab, n (%)                                    | 142 (63.1)                                             | 134 (96.4)                                                          | 144 (99.3)                                             | 420 (82.5)           |
| Reasons for permanent discontinuations                                     |                                                        |                                                                     |                                                        |                      |
| Progressive disease                                                        | 105 (46.7)                                             | 95 (68.3)                                                           | 105 (72.4)                                             | 305 (59.9)           |
| Death                                                                      | 12 (5.3)                                               | 16 (11.5)                                                           | 22 (15.2)                                              | 50 (9.8)             |
| Adverse event                                                              | 7 (3.1)                                                | 14 (10.1)                                                           | 11 (7.6)                                               | 32 (6.3)             |
| Physician decision                                                         | 11 (4.9)                                               | 3 (2.2)                                                             | 2 (1.4)                                                | 16 (3.1)             |
| Patient/guardian decision                                                  | 6 (2.7)                                                | 2 (1.4)                                                             | 2 (1.4)                                                | 10 (2.0)             |
| Study terminated by sponsor                                                | 0                                                      | 3 (2.2)                                                             | 0                                                      | 3 (0.6)              |
| Completed study                                                            | 1 (0.4)                                                | 1 (0.7)                                                             | 0                                                      | 2 (0.4)              |

| Reasons for dose reductions, interruptions, and permanent discontinuations | Long-term Duration of Benefit, ≥12 months<br>(n = 225) | Intermediate Duration of Benefit, ≥6 mo and <12 months<br>(n = 139) | Short-term Duration of Benefit, <6 months<br>(n = 145) | Overall<br>(N = 509) |
|----------------------------------------------------------------------------|--------------------------------------------------------|---------------------------------------------------------------------|--------------------------------------------------------|----------------------|
| Loss to follow-up                                                          | 0                                                      | 0                                                                   | 2 (1.4)                                                | 2 (0.4)              |
| Permanent discontinuation of tram, n (%)                                   | 135 (60.0)                                             | 125 (89.9)                                                          | 124 (85.5)                                             | 384 (75.4)           |
| Reasons for permanent discontinuations                                     |                                                        |                                                                     |                                                        |                      |
| Progressive disease                                                        | 97 (43.1)                                              | 86 (61.9)                                                           | 86 (59.3)                                              | 269 (52.8)           |
| Death                                                                      | 12 (5.3)                                               | 16 (11.5)                                                           | 22 (15.2)                                              | 50 (9.8)             |
| Adverse event                                                              | 9 (4.0)                                                | 12 (8.6)                                                            | 11 (7.6)                                               | 32 (6.3)             |
| Physician decision                                                         | 9 (4.0)                                                | 4 (2.9)                                                             | 1 (0.7)                                                | 14 (2.8)             |
| Patient/guardian decision                                                  | 6 (2.7)                                                | 3 (2.2)                                                             | 2 (1.4)                                                | 11 (2.2)             |
| Loss to follow-up                                                          | 1 (0.4)                                                | 0                                                                   | 2 (1.4)                                                | 3 (0.6)              |
| Study terminated by sponsor                                                | 0                                                      | 3 (2.2)                                                             | 0                                                      | 3 (0.6)              |
| Completed study                                                            | 1 (0.4)                                                | 1 (0.7)                                                             | 0                                                      | 2 (0.4)              |

Abbreviations: dab, dabrafenib; tram, trametinib.

Note: A patient can have more than 1 dose reduction/treatment interruption; therefore, the percentages may sum to >100%.
